# Supplementary material for: Evaluating Changes in Experimentation, Critical Thinking, and Sense of Wonder in Participants of Science North’s In-School Outreach Programs
Source: Frontiers journal article supplement (doi:10.3389/feduc.2022.675306), 2022-03-16
Supplement: Data_Sheet_1.PDF [file Data_Sheet_1.PDF]

## APPROVAL FOR CONDUCTING RESEARCH INVOLVING HUMAN SUBJECTS

Research Ethics Board – Laurentian University

This letter confirms that the research project identified below has successfully passed the ethics review by the Laurentian University Research Ethics Board (REB). Your ethics approval date, other milestone dates, and any special conditions for your project are indicated below.

| TYPE OF APPROVAL / New X / Modifications to project / Time extension          |                                                                                                                                         |
|-------------------------------------------------------------------------------|-----------------------------------------------------------------------------------------------------------------------------------------|
| <b>Name of Principal Investigator and school/department</b>                   | Kaitlin Richard, Science Communications, supervisor Chantal Barriault                                                                   |
| <b>Title of Project</b>                                                       | Evaluating changes in experimentation, critical thinking, and sense of wonder in participants of Science North school outreach programs |
| <b>REB file number</b>                                                        | 6017183                                                                                                                                 |
| <b>Date of original approval of project</b>                                   | March 14, 2019                                                                                                                          |
| <b>Date of approval of project modifications or extension (if applicable)</b> |                                                                                                                                         |
| <b>Final/Interim report due on:</b><br><i>(You may request an extension)</i>  | March 14, 2020                                                                                                                          |
| <b>Conditions placed on project</b>                                           | Please provide the LUREB with the School approval when obtained.                                                                        |

During the course of your research, no deviations from, or changes to, the protocol, recruitment or consent forms may be initiated without prior written approval from the REB. If you wish to modify your research project, please refer to the Research Ethics website to complete the appropriate REB form.

All projects must submit a report to REB at least once per year. If involvement with human participants continues for longer than one year (e.g. you have not completed the objectives of the study and have not yet terminated contact with the participants, except for feedback of final results to participants), you must request an extension using the appropriate LU REB form. In all cases, please ensure that your research complies with Tri-Council Policy Statement (TCPS). Also please quote your REB file number on all future correspondence with the REB office.

Congratulations and best wishes in conducting your research.

A handwritten signature in blue ink that reads "Rosanna Langer". The signature is fluid and cursive, with the first name "Rosanna" and the last name "Langer" clearly distinguishable.

Rosanna Langer, PHD, Chair, *Laurentian University Research Ethics Board*
