# Supplementary material for: Evaluating Changes in Experimentation, Critical Thinking, and Sense of Wonder in Participants of Science North’s In-School Outreach Programs
Source: Frontiers journal article supplement (doi:10.3389/feduc.2022.675306), 2022-03-16
Supplement: Data_Sheet_2.PDF [file Data_Sheet_2.PDF]

**Title:** Evaluating changes in experimentation, critical thinking, and sense of wonder in participants of Science North In-School Outreach programs

**Investigator:** Kaitlin Richard

## Student Survey

### Self-Generated Identification Code Questions

*The following questions will be used to link your first and second survey together*

How many sisters do you have? (If none, write 0) \_\_\_\_

How many brothers do you have? (If none, write 0) \_\_\_\_

What day of the month were you born (0-31)? \_\_\_\_

What is the first letter of your middle name? (if none, write X) \_\_\_\_

What is the second letter of your last name? \_\_\_\_

**Write and/or draw what you think of when you hear the word science:**

SCIENCE

**How does science make you FEEL?**

Circle one (1) emoji.

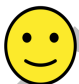

HAPPY

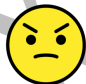

ANGRY

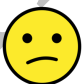

CONFUSED

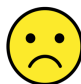

SAD

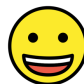

EXCITED

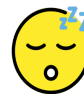

BORED

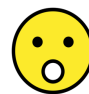

SURPRISED

**Please choose how much you agree or disagree with the following statements:**

1. Science is something I get excited about

STRONGLY AGREE

AGREE

DISAGREE

STRONGLY DISAGREE

2. I like to work on science activities

STRONGLY AGREE

AGREE

DISAGREE

STRONGLY DISAGREE

3. I am curious to learn more about science

STRONGLY AGREE      AGREE      DISAGREE      STRONGLY DISAGREE

4. I like to see how things are made (for example, ice-cream, TV, iphone)

STRONGLY AGREE      AGREE      DISAGREE      STRONGLY DISAGREE

5. I get excited to find out that I will be doing a science activity

STRONGLY AGREE      AGREE      DISAGREE      STRONGLY DISAGREE

6. I like to talk about planets and stars

STRONGLY AGREE      AGREE      DISAGREE      STRONGLY DISAGREE

7. I would like to experiment with the gadgets inside the space station

STRONGLY AGREE      AGREE      DISAGREE      STRONGLY DISAGREE

8. I find it easy to say what I think about a challenge

STRONGLY AGREE      AGREE      DISAGREE      STRONGLY DISAGREE

9. I think of possible results or what might happen before I make a decision

STRONGLY AGREE      AGREE      DISAGREE      STRONGLY DISAGREE

10. I can figure out the best way to deal with something that needs to be solved

STRONGLY AGREE      AGREE      DISAGREE      STRONGLY DISAGREE

11. I keep my mind open to different ideas when planning to make a decision

STRONGLY AGREE      AGREE      DISAGREE      STRONGLY DISAGREE

**Please answer the following questions with YES or NO:**

I can make a chart or picture to show information      YES      NO

I can do an experiment to answer a question      YES      NO

I can write down information correctly      YES      NO

I can tell others how to do an experiment      YES      NO

I can explain why things happen in an experiment      YES      NO

**You've reached the end of the survey! Thank you for participating!!**
